# Supplementary material for: Chromosome architecture as a determinant for biosynthetic diversity in Micromonospora
Source: PubMed Central journal article supplement (PMC11537254; doi:10.1099/mgen.0.001313), 2024-11-05
Supplement: mgen-10-01313-s001.pdf [file mgen-10-01313-s001.pdf]

## Supporting Figures

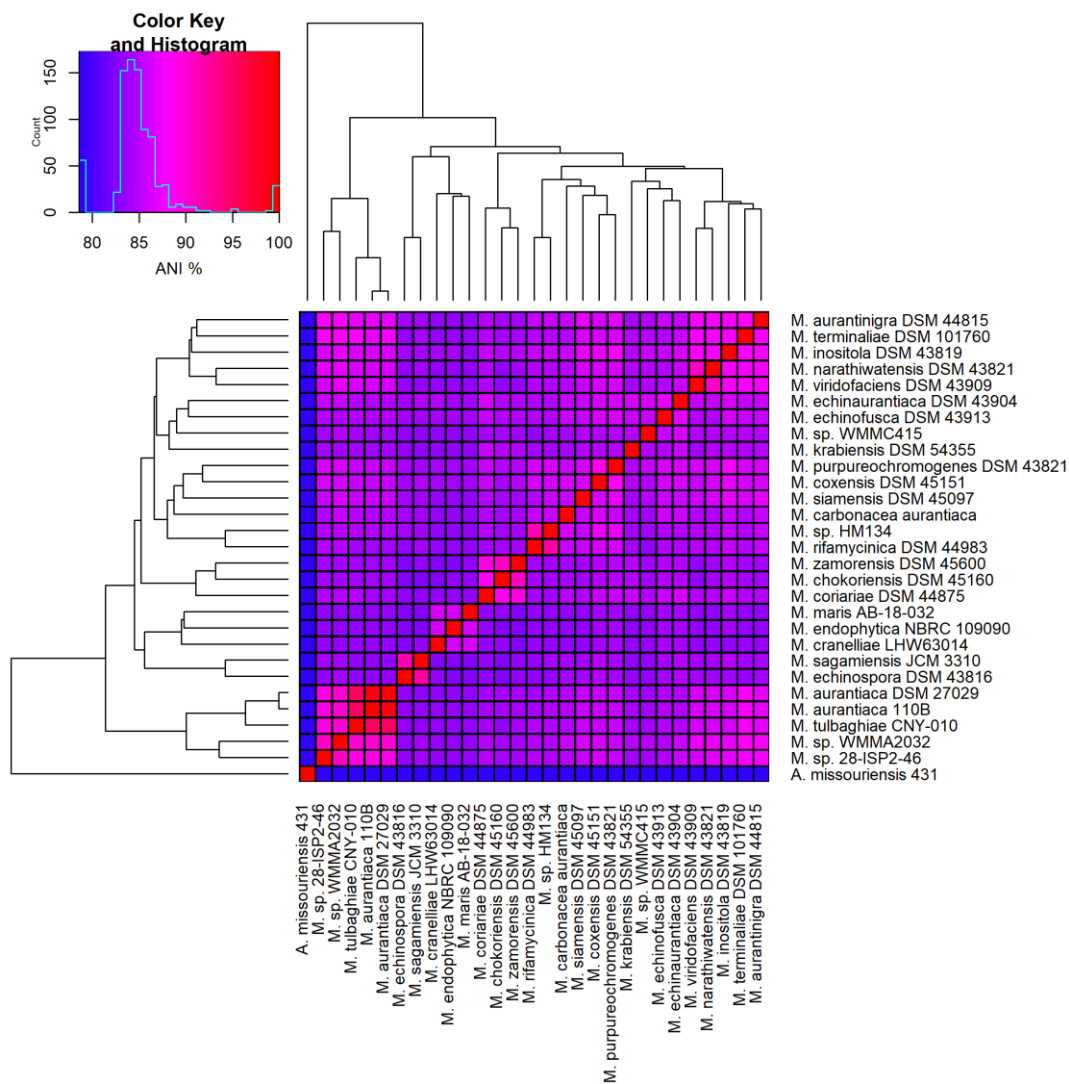

**Figure S1 ANI of well assembled *Micromonospora*.** Average nucleotide identity was calculated using the FastANI algorithm, and used to inform organisation of alignments presented in Figure 1

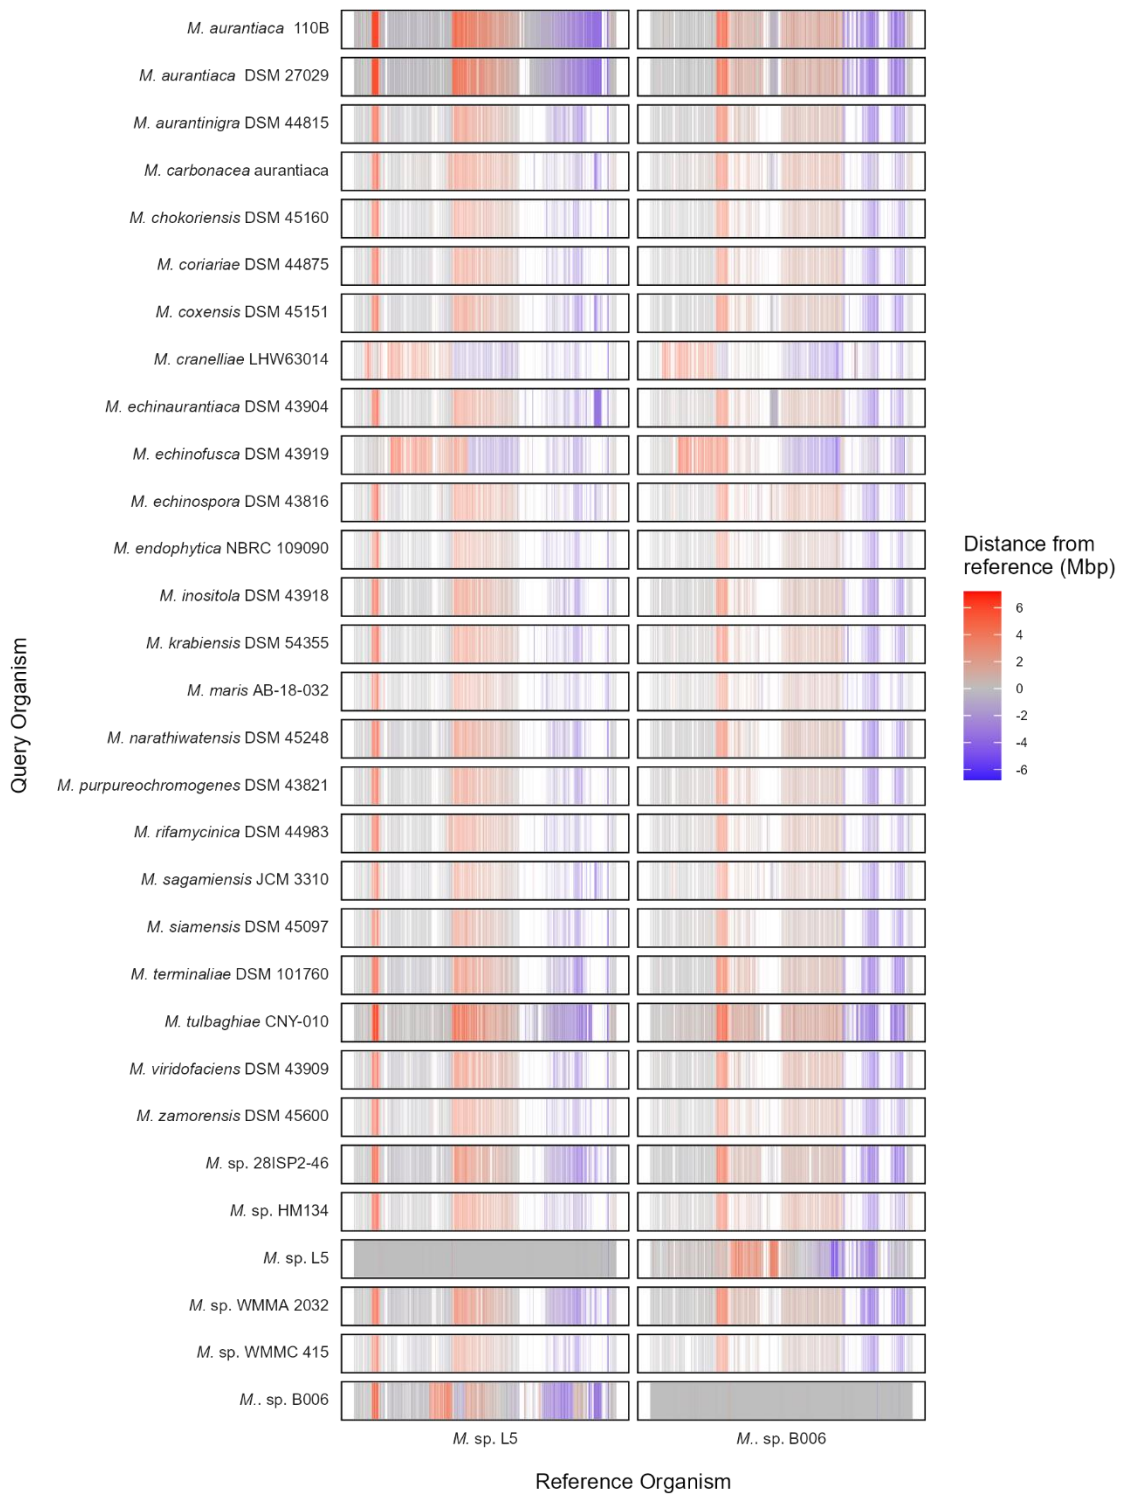

**Figure S2. Justification for exclusion of *M. sp. L5* and *M. sp. B006*.** *M. sp. L5* contains a large inversion which we believe to be biologically implausible, as it would bring the site of DNA replication termination close to the origin of replication if true. *M. sp. B006* contains a number of spurious rearrangements. Hence, we chose to exclude these two assemblies.

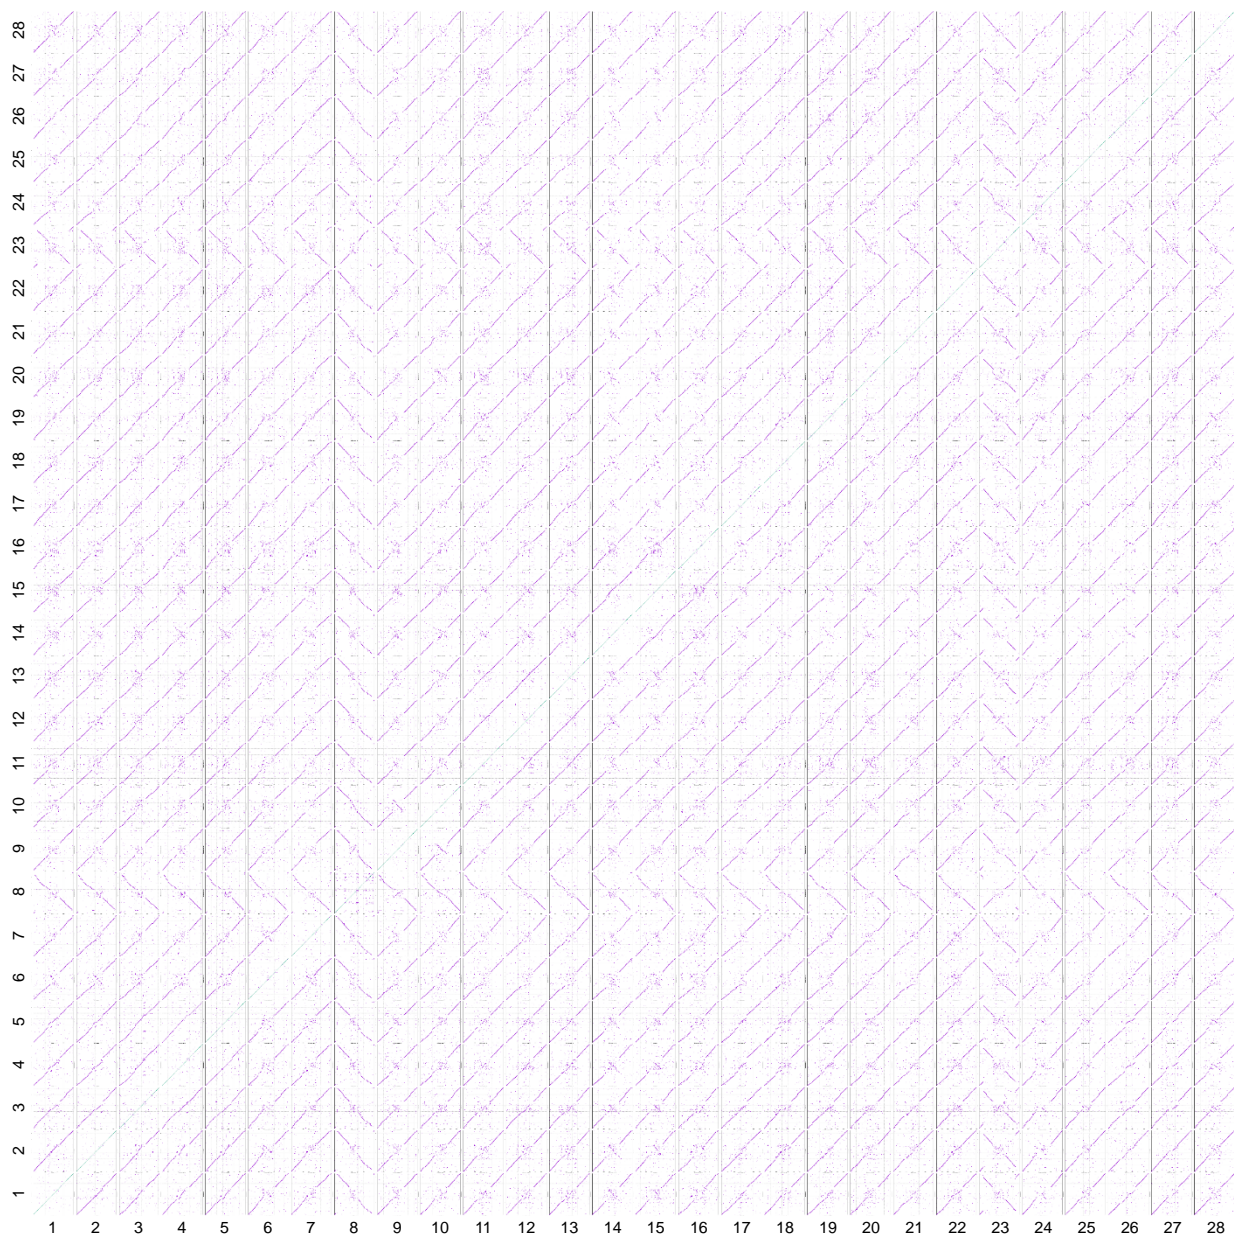

**Figure S3. Pairwise nucleotide alignments.** Dotplots of pairwise nucleotide alignments of all 28 strains analysed in this work. The numbers on the bottom left and right of the panel represent strains, as follows.

1: *M. sp.* 28-ISP2-46; 2: *M. sp.* WMMA2032; 3: *M. tulbaghia* CNY-010; 4: *M. aurantiaca* 110B; 5: *M. aurantiaca* DSM 27029; 6: *M. echinospora* DSM 43816; 7: *M. sagamiensis* JCM 3310; 8: *M. cranelliae* LHW63014; 9: *M. endophytica* NBRC 109090; 10: *M. maris* AB-18-032; 11: *M. coriariae* DSM 44875; 12: *M. chokoriensis* DSM 45160; 13: *M. zamorensis* DSM 45600; 14: *M. rifamycinica* DSM 44983; 15: *M. sp.* HM134; 16: *M. carbonacea* aurantiaca; 17: *M. siamensis* DSM 45067; 18: *M. coxensis* DSM 45151; 19: *M. purpureochromogenes* DSM 43821; 20: *M. krabiensis* DSM 54355; 21: *M. sp.* WMMC45; 22: *M. echinofusca* DSM 43913; 23: *M. echinaurantiaca* DSM 43904; 24: *M. viridofaciens* DSM 43909; 25: *M. narathiwatensis* DSM 43821; 26: *M. inositola* DSM 43819; 27: *M. terminaliae* DSM 101760; 28: *M. aurantinigra* DSM 44815

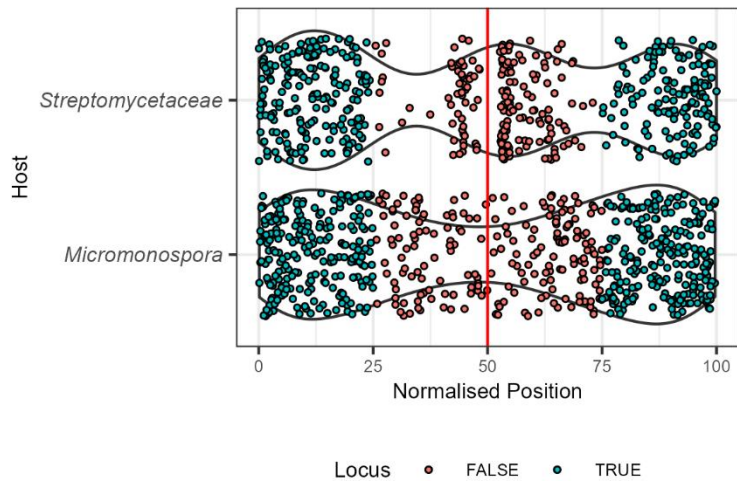

Figure S4. Comparison of BGC distribution in linear and circular chromosomes. Violin plots of BGC distribution in *Streptomycetaceae* (19 complete *Streptomyces* chromosomes and 1 complete *Kitasatospora* chromosome) and *Micromonospora* with the *Micromonospora* origin of replication at position 50. *Micromonospora* are distinct by having an *oriC*-proximal suite of BGCs that streptomycetes lack.



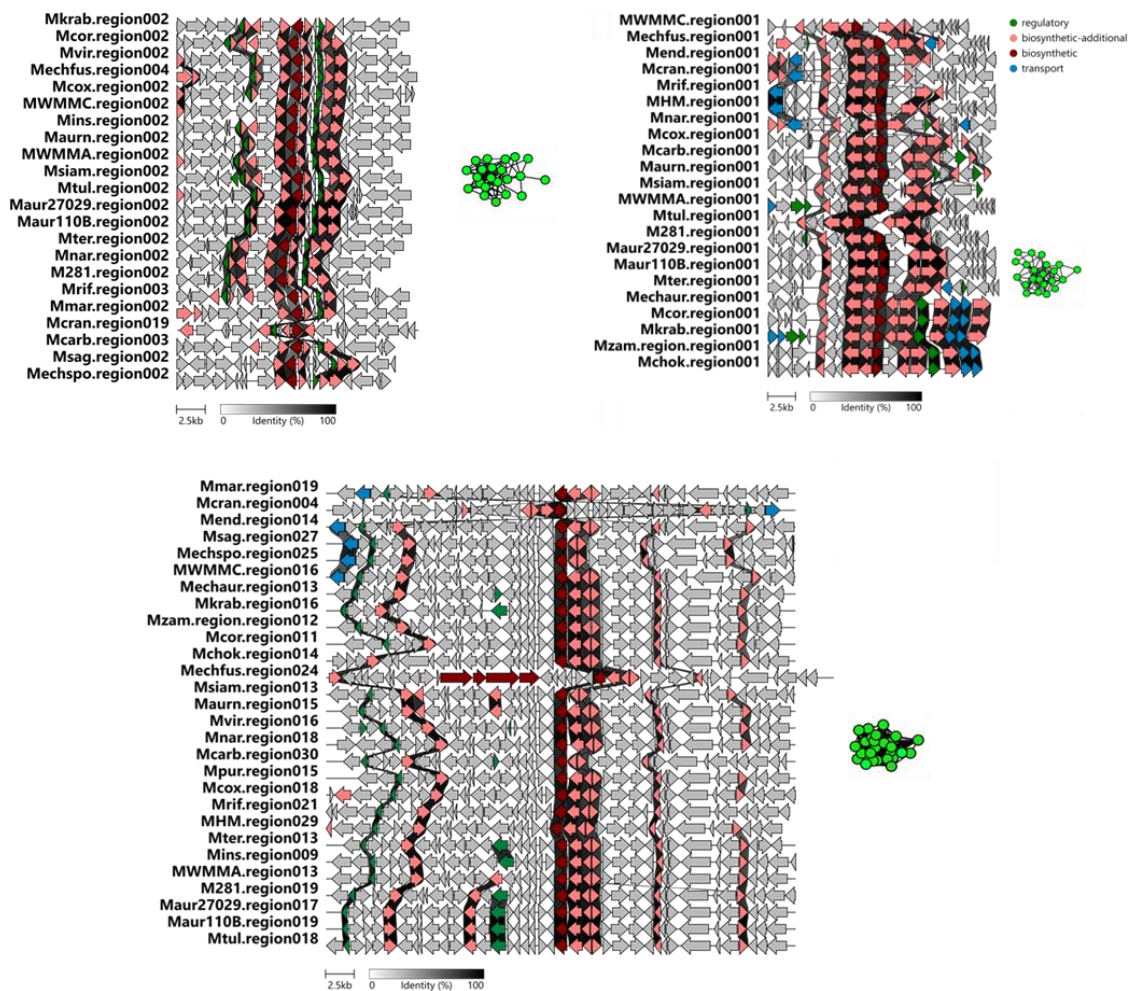

**Figure S5.** Clinker alignments of conserved, syntenous BGCs. Key biosynthetic enzymes, as predicted by antiSMASH, are annotated.
