# Supplementary material for: Chromosome architecture as a determinant for biosynthetic diversity in Micromonospora
Source: PubMed Central journal article supplement (PMC11537254; doi:10.1099/mgen.0.001313), 2024-11-05
Supplement: mgen-10-01313-s002.pdf [file mgen-10-01313-s002.pdf]

| <b>Organism</b>                              | <b>Accession</b> | <b>Assembly Level</b> | <b>Included</b> |
|----------------------------------------------|------------------|-----------------------|-----------------|
| <i>M. aurantiaca</i> DSM 27029               | GCA_000145235.1  | Complete              | Yes             |
| <i>M. carbonaceae aurantiaca</i>             | GCA_013389765.1  | Complete              | Yes             |
| <i>M. maris</i> AB-18-032                    | GCA_000204155.1  | Complete              | Yes             |
| <i>M. cranelliae</i> LHW63014                | GCA_014764405.1  | Complete              | Yes             |
| <i>Micromonospora terminaliae</i> DSM 101760 | GCA_009671205.1  | Complete              | Yes             |
| <i>M. sagamiensis</i> JCM 3310               | GCA_014680085.1  | Complete              | Yes             |
| <i>M. aurantiaca</i> 110B                    | GCA_003351365.1  | Complete              | Yes             |
| <i>M. endophytica</i> NBRC 109090            | GCA_018326245.1  | Complete              | Yes             |
| <i>Micromonospora</i> sp. HM134              | GCA_007833915.1  | Complete              | Yes             |
| <i>Micromonospora</i> sp. B006               | GCA_003408515.1  | Complete              | No              |
| <i>Micromonospora</i> sp. L5                 | GCA_000177655.2  | Complete              | No              |
| <i>M. echinospora</i> DSM 43816              | GCA_900091495.1  | Chromosome            | Yes             |
| <i>M. rifamycinica</i> DSM 44983             | GCA_900090265.1  | Chromosome            | Yes             |
| <i>M. echinofusca</i> DSM 43913              | GCA_900091445.1  | Chromosome            | Yes             |
| <i>M. aurantinigra</i> DSM 44815             | GCA_900089595.1  | Chromosome            | Yes             |
| <i>M. purpureochromogenes</i> DSM 43812      | GCA_900091515.1  | Chromosome            | Yes             |
| <i>M. echinaurantiaca</i> DSM 43904          | GCA_900090235.1  | Chromosome            | Yes             |
| <i>M. zamorensis</i> DSM 45600               | GCA_900090275.1  | Chromosome            | Yes             |
| <i>M. krabiensis</i> DSM 45344               | GCA_900091425.1  | Chromosome            | Yes             |
| <i>M. viridifaciens</i> DSM 43909            | GCA_900091545.1  | Chromosome            | Yes             |

|                                        |                 |            |     |
|----------------------------------------|-----------------|------------|-----|
| <i>M. coriariae</i> DSM 44875          | GCA_900091455.1 | Chromosome | Yes |
| <i>M. chokoriensis</i> DSM 45160       | GCA_900091505.1 | Chromosome | Yes |
| <i>M. coxensis</i> DSM 45161           | GCA_900090295.1 | Chromosome | Yes |
| <i>M. inositola</i> DSM 43819          | GCA_900090285.1 | Chromosome | Yes |
| <i>Micromonospora</i> sp.<br>28ISP2-46 | GCA_013694245.1 | Chromosome | Yes |
| <i>M. narathiwatensis</i> DSM<br>45248 | GCA_900089605.1 | Chromosome | Yes |
| <i>M. siamensis</i> DSM 45907          | GCA_900090305.1 | Chromosome | Yes |
| <i>Micromonospora</i> sp.<br>WMMA2032  | GCA_002688545.1 | Chromosome | Yes |
| <i>Micromonospora</i> sp.<br>WMMC415   | GCA_009707425.1 | Chromosome | Yes |
| <i>M. tulbaghia</i> CNY-010            | GCA_003612775.1 | Complete   | Yes |
